# Supplementary material
Source: MDPI journal article supplement (https://www.mdpi.com/2075-163X/12/2/109)
Supplement: s1 [file s1]

# Proposition of a Thermogravimetric Method to Measure the Ferrous Iron Content in Metallurgical-Grade Chromite

Marcus Sommerfeld <sup>1\*</sup>, Bernd Friedrich <sup>1</sup>

<sup>1</sup> IME Process Metallurgy and Metal Recycling, Institute of RWTH Aachen University; 52056 Aachen, Germany; msommerfeld@ime-aachen.de (M.S.); bfriedrich@ime-aachen.de (B.F.)

\* Correspondence: msommerfeld@ime-aachen.de; Tel.: +492418095200

## 1. Raman Measurement

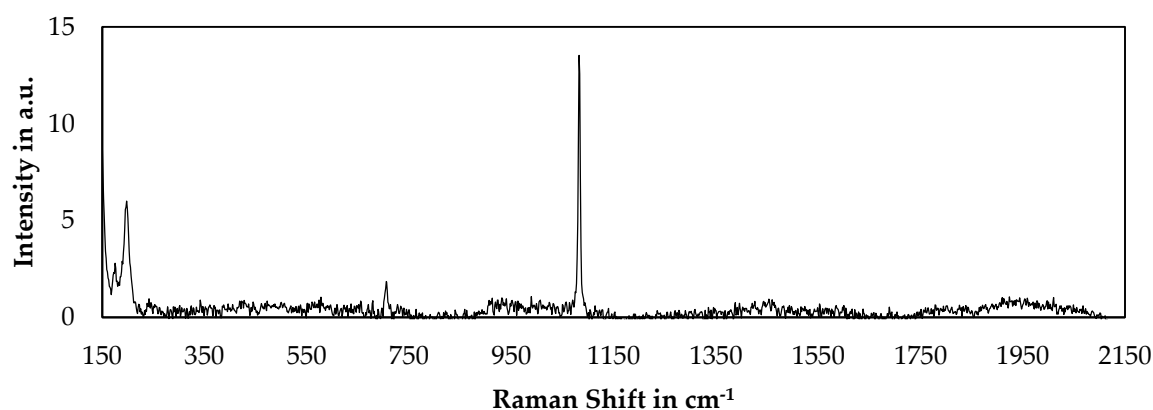

Figure S1. Raman Spectrum: Aragonite.

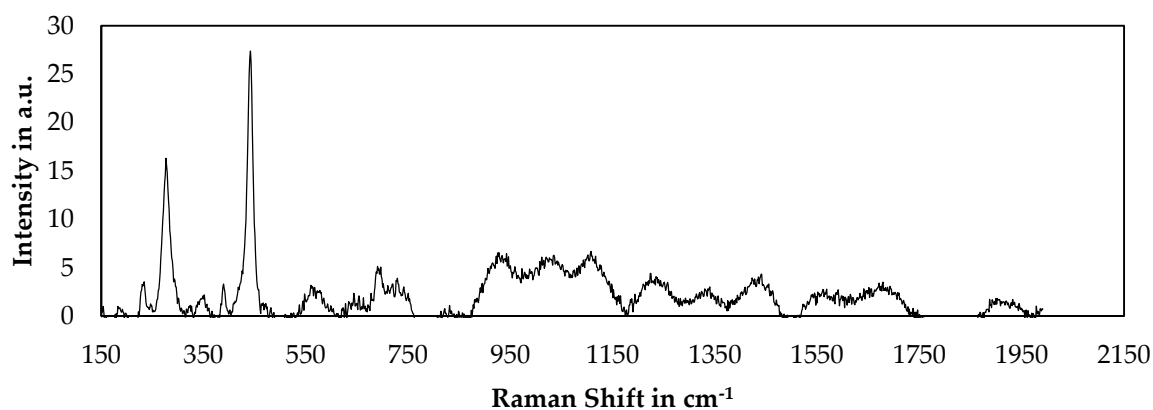

Figure S2. Raman Spectrum: Brucite.

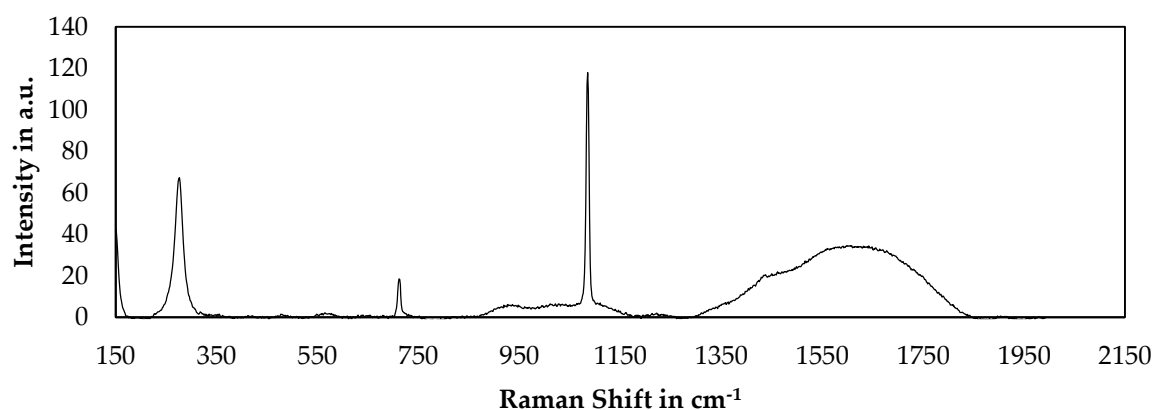

Figure S3. Raman Spectrum: Calcite.

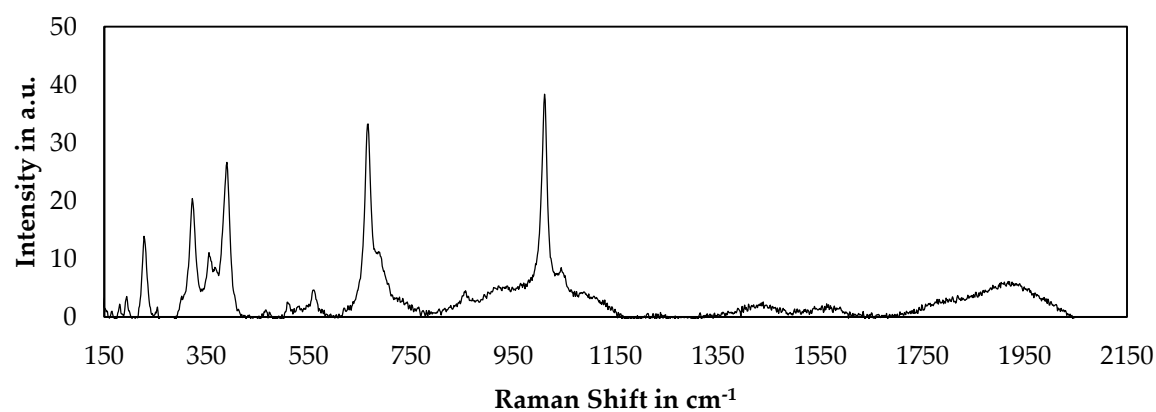

Figure S4. Raman Spectrum: Diopside.

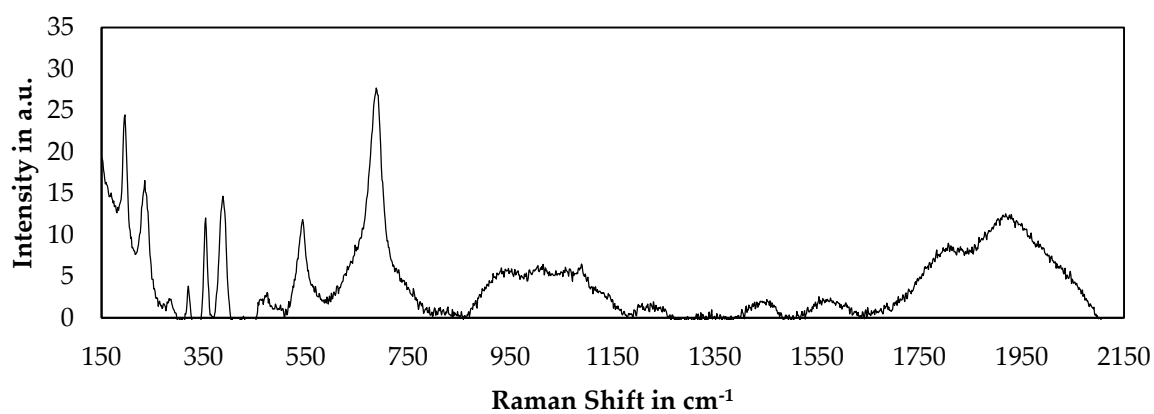

Figure S5. Raman Spectrum: Dozyite.

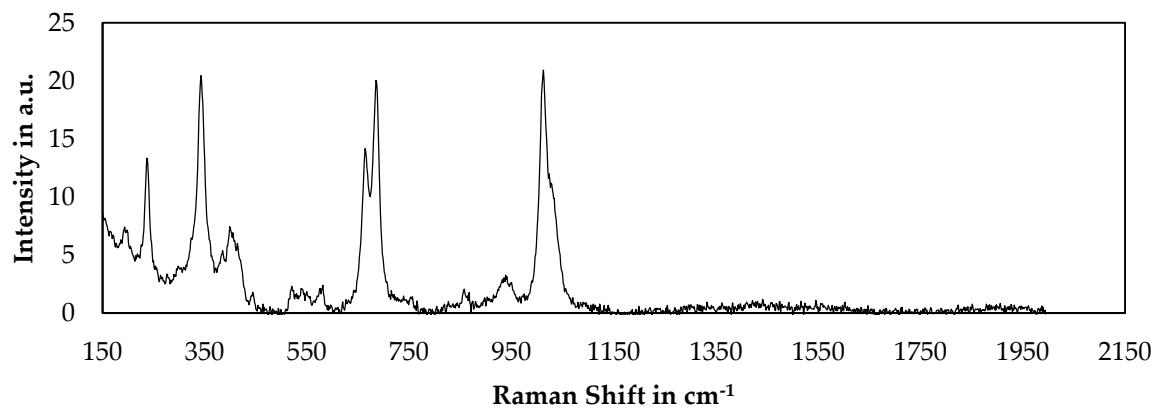

Figure S6. Raman Spectrum: Enstatite.

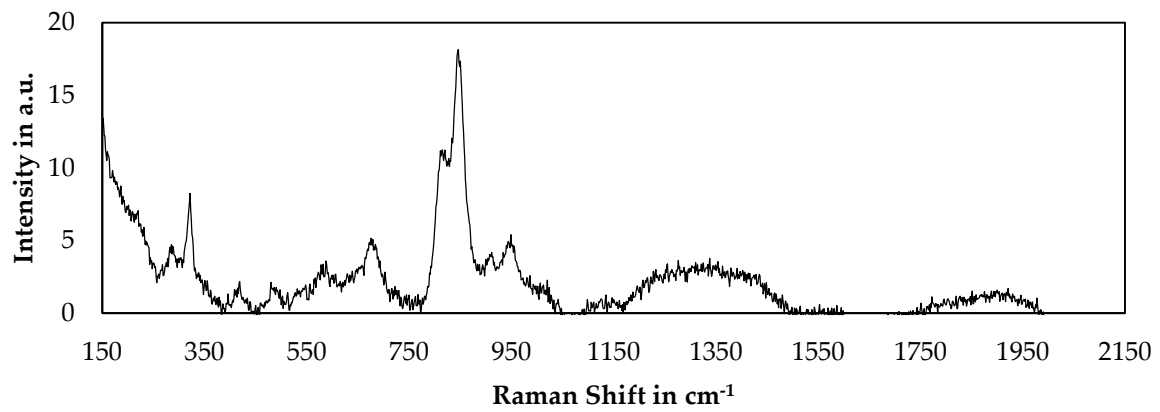

Figure S7. Raman Spectrum: Fayalite.

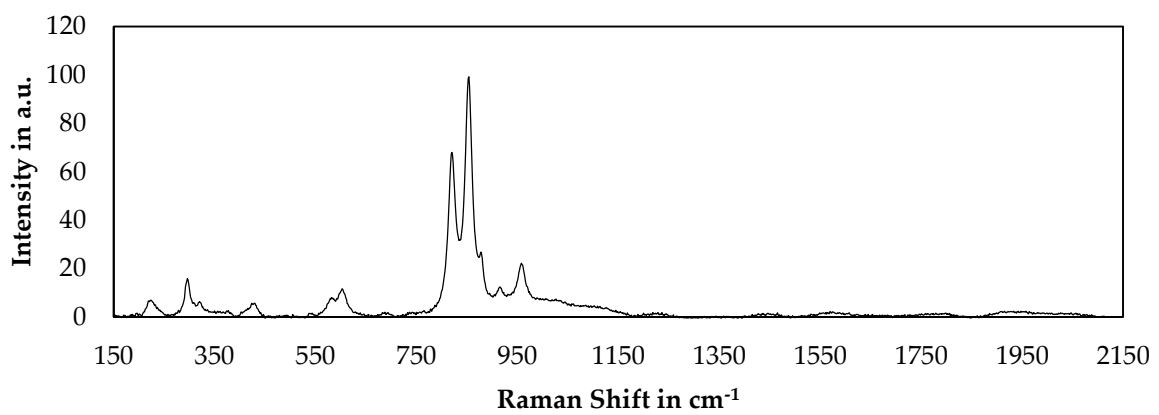

Figure S8. Raman Spectrum: Forsterite.

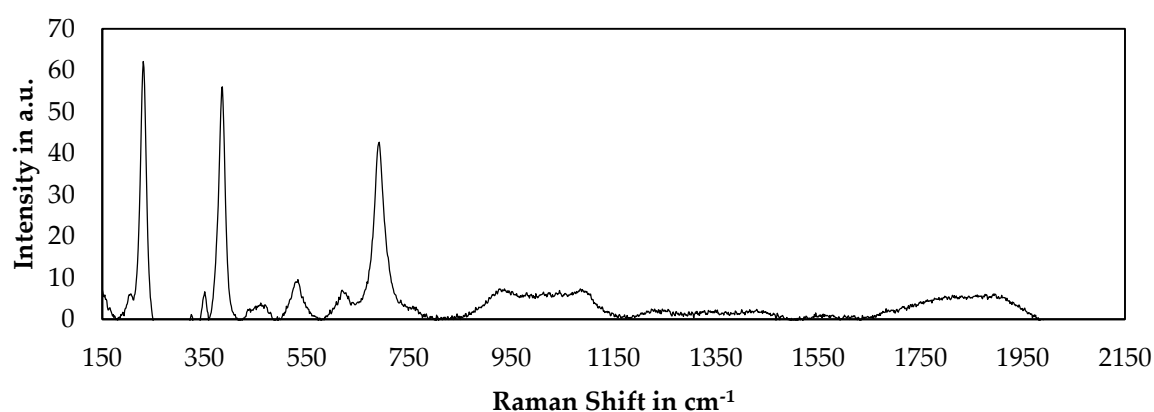

Figure S9. Raman Spectrum: Lizardite.

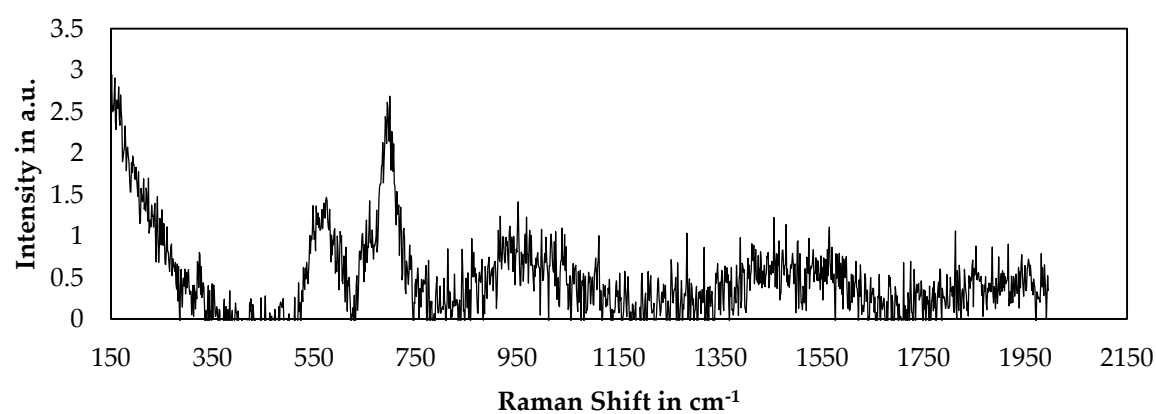

Figure S10. Raman Spectrum: Magnesiochromite.

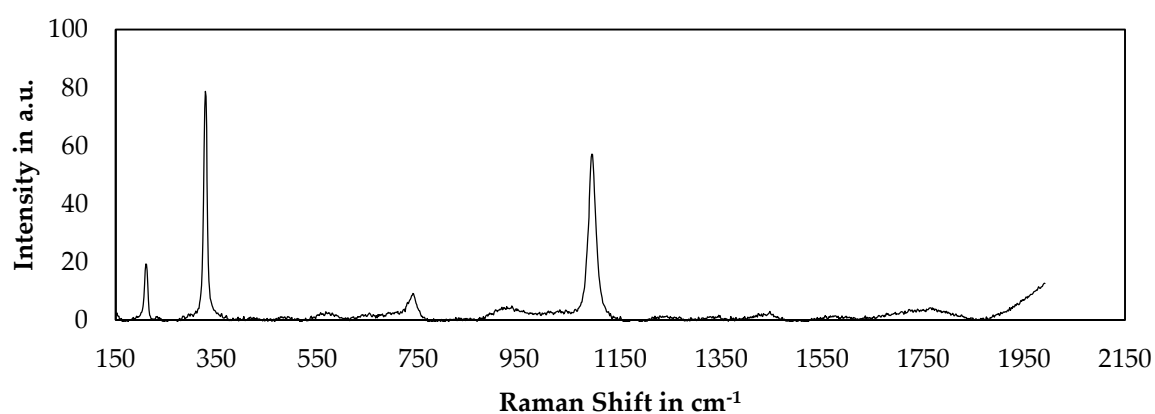

Figure S11. Raman Spectrum: Magnesite.

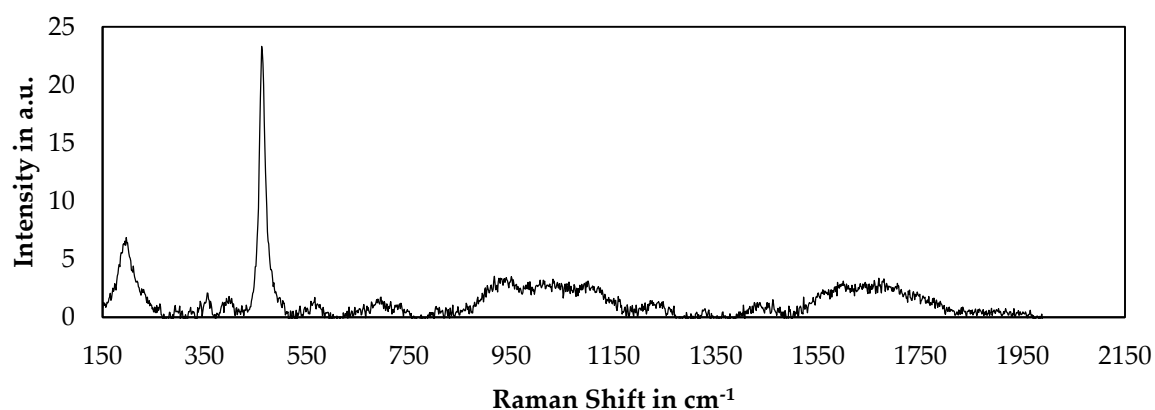

Figure S12. Raman Spectrum: Quartz.

## 2. QEMSCAN®

Table S1. QEMSCAN® analysis in vol%, wt% and used density for conversion.

| Mineral       | Content in vol% | Mineral used for conversion | Density in g/cm <sup>3</sup> | Content in wt% |
|---------------|-----------------|-----------------------------|------------------------------|----------------|
| Chromite      | 76.05           | Chromite                    | 4.79                         | 82.13          |
| Olivine       | 18.55           | Olivine                     | 3.32                         | 13.88          |
| Mg-Chromite   | 1.64            | Mg-Chromite                 | 4.20                         | 1.55           |
| MgAl-Silicate | 1.26            | Cordierite                  | 2.65                         | 0.75           |
| Brucite       | 1.17            | Brucite                     | 2.39                         | 0.63           |
| Others        | 0.60            | Mean Value                  | 3.39                         | 0.46           |
| Pyroxene      | 0.28            | Enstatite                   | 3.20                         | 0.20           |
| Fe-Oxide      | 0.20            | Magnetite                   | 5.15                         | 0.23           |
| Quartz        | 0.13            | Quartz                      | 2.62                         | 0.08           |
| Calcite       | 0.07            | Calcite                     | 2.71                         | 0.04           |
| Dolomite      | 0.05            | Dolomite                    | 2.84                         | 0.03           |

### 3. Trace Elements

**Table S2.** Concentration of trace elements in the chromite sample according to an ICP-Scan and XRF.

| Concentration of Trace Element in ppm |      |      |      |      |      |
|---------------------------------------|------|------|------|------|------|
| Element                               | Ag   | Au   | As   | B    | Ba   |
| ICP-Scan                              | <10  | n.a. | <1   | <10  | <10  |
| ProTrace XRF                          | <1   | 12   | 5    | n.a. | 80   |
| Element                               | Bi   | Br   | Cd   | Ce   | Co   |
| ICP-Scan                              | <10  | n.a. | 0.42 | n.a. | 27.8 |
| ProTrace XRF                          | 3    | 2    | <1   | <1   | 225  |
| Element                               | Cu   | Ga   | Ge   | Hf   | Hg   |
| ICP-Scan                              | <10  | <10  | n.a. | n.a. | n.a. |
| ProTrace XRF                          | 13   | 10   | <1   | <1   | <1   |
| Element                               | La   | Li   | Mo   | Nb   | Nd   |
| ICP-Scan                              | n.a. | <10  | <1   | <10  | n.a. |
| ProTrace XRF                          | 53   | n.a. | 1    | <1   | <1   |
| Element                               | Pb   | Rb   | Sb   | Sc   | Se   |
| ICP-Scan                              | 37.9 | n.a. | <10  | n.a. | <1   |
| ProTrace XRF                          | 30   | <1   | n.a. | 26   | <1   |
| Element                               | Sn   | Sr   | Ta   | Te   | Th   |
| ICP-Scan                              | <10  | <10  | <10  | <1   | n.a. |
| ProTrace XRF                          | <1   | 4    | <1   | 24   | <1   |
| Element                               | U    | W    | Y    | Yb   | Zn   |
| ICP-Scan                              | n.a. | 100  | n.a. | n.a. | 640  |
| ProTrace XRF                          | 3    | 117  | <1   | <1   | 705  |

\*n.a.: not analyzed

### 4. Particle Size

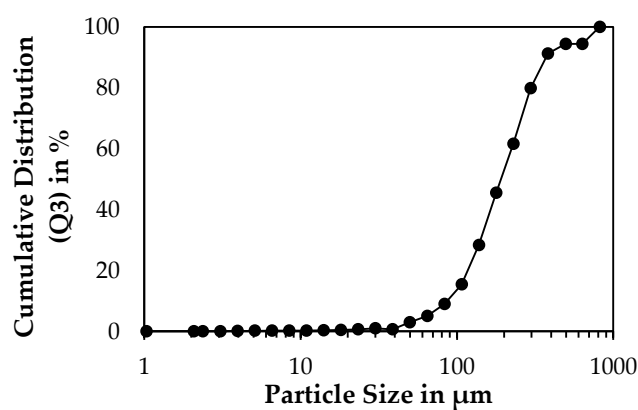

**Figure S13.** Particle size as determined by dynamic imaging analysis.
